# Supplementary material for: Low autonomic arousal as a risk factor for reoffending: A population-based study
Source: PLoS One. 2021 Aug 20;16(8):e0256250. doi: 10.1371/journal.pone.0256250 (PMC8378731; doi:10.1371/journal.pone.0256250)
Supplement: S7 Table — (DOCX) [file pone.0256250.s007.docx]

**S7 Table. Fully Adjusted Cox Proportional Hazard Regression Models for RHR and SBP with Reoffending as Non-Violent Convictions with First Conviction and Reoffending at Any Point in Time among Men with No Violent Convictions**

|  | **Hazard Ratio (95% CI)** |  | **Hazard Ratio (95% CI)** |
| --- | --- | --- | --- |
|  | **Fully adjusted modelac** |  | **Fully adjusted modelbd** |
| **Quintiles for RHR in bpm** |  | **Quintiles for RHR in bpm** |  |
| 1st (35-60) | 1.09 (1.06, 1.12) | 1st (35-60) | 1.07 (1.04, 1.10) |
| 2nd (61-67) | 1.06 (1.03, 1.09) | 2nd (61-67) | 1.05 (1.02, 1.08) |
| 3rd (68-73) | 1.07 (1.04, 1.09) | 3rd (68-73) | 1.05 (1.03, 1.08) |
| 4th (74-81) | 1.05 (1.02, 1.08) | 4th (74-81) | 1.04 (1.01, 1.07) |
| 5th (82-145) | Reference | 5th (82-145) | Reference |
| **Quintiles for SBP in mmHg** |  | **Quintiles for SBP in mmHg** |  |
| 1st (80-119) | 1.16 (1.13, 1.18) | 1st (80-119) | 1.13 (1.11, 1.16) |
| 2nd (120-123) | 1.12 (1.09, 1.14) | 2nd (120-123) | 1.10 (1.08, 1.13) |
| 3rd (124-129) | 1.07 (1.05, 1.09) | 3rd (124-129) | 1.06 (1.04, 1.08) |
| 4th (130-137) | 1.04 (1.02, 1.06) | 4th (130-137) | 1.03 (1.01, 1.05) |
| 5th (138-160) | Reference | 5th (138-160) | Reference |

Abbreviations: RHR (resting heart rate), bpm (beats per minute), SBP (systolic blood pressure), mmHg (millimeter of mercury)

aTime since first crime as the underlying time scale

bAge as the underlying time scale

cAdjusted for age at first crime, birth year, SES, physical capacity, height, and weight

dAdjusted for birth year, SES, physical capacity, height, and weight
