# Supplementary material for: Low autonomic arousal as a risk factor for reoffending: A population-based study
Source: PLoS One. 2021 Aug 20;16(8):e0256250. doi: 10.1371/journal.pone.0256250 (PMC8378731; doi:10.1371/journal.pone.0256250)
Supplement: S11 Table — (DOCX) [file pone.0256250.s011.docx]

**S11 Table. Fully Adjusted Cox Proportional Hazard Regression Models for SBP and Reoffending as Any Conviction, Violent Convictions, and Non-Violent Convictions with First Conviction and Reoffending at Any Point in Time Using Date of Crime when Applicable**

|  | **Hazard Ratio (95% CI)** |
| --- | --- |
| **Quintiles for SBP in mmHg** | **Fully adjusted modelab** |
| **All convictions** |  |
| 1st (80-119) | 1.19 (1.17, 1.21) |
| 2nd (120-123) | 1.13 (1.11, 1.15) |
| 3rd (124-129) | 1.09 (1.07, 1.10) |
| 4th (130-137) | 1.06 (1.04, 1.08) |
| 5th (138-160) | Reference |
| **Violent convictions** |  |
| 1st (80-119) | 1.16 (1.12, 1.20) |
| 2nd (120-123) | 1.09 (1.05, 1.13) |
| 3rd (124-129) | 1.06 (1.02, 1.10) |
| 4th (130-137) | 1.07 (1.04, 1.11) |
| 5th (138-160) | Reference |
| **Non-violent convictions** |  |
| 1st (80-119) | 1.20 (1.18, 1.22) |
| 2nd (120-123) | 1.14 (1.12, 1.16) |
| 3rd (124-129) | 1.09 (1.07, 1.11) |
| 4th (130-137) | 1.06 (1.05, 1.08) |
| 5th (138-160) | Reference |

Abbreviations: SBP (systolic blood pressure), mmHg (millimeter of mercury)

aTime since first crime as the underlying time scale

bAdjusted for age at first crime, birth year, SES, physical capacity, height, and weight
